# Supplementary material
Source: publisher figshare collection journal article supplement (https://asha.figshare.com/articles/dataset/_/21357729)
Supplement: Supplementary file 1 [file 1]

**Supplemental Material S5.** Means and standard deviations (in parentheses) of the accuracy of the native Mandarin listeners.

|                                 | <b>Visual stimuli</b> |                  | <b>Diff.</b> |
|---------------------------------|-----------------------|------------------|--------------|
|                                 | Present               | Absent           |              |
| <b>Auditory stimuli absent</b>  |                       |                  |              |
| H+A–V+ vs. H+A–V–               | 0.946<br>(0.087)      | 0.949<br>(0.077) | –0.003       |
| H–A–V+ vs. H–A–V–               | 0.944<br>(0.078)      | 0.963<br>(0.078) | –0.019       |
| <b>Auditory stimuli present</b> |                       |                  |              |
| H+A+V+ vs. H+A+V–               | 0.974<br>(0.039)      | 0.961<br>(0.044) | 0.013        |
| H–A+V+ vs. H–A+V–               | 0.958<br>(0.074)      | 0.969<br>(0.058) | –0.011       |

*Note.* Diff. = difference between the presence and absence of the visual stimuli; H+ = high variability, H– = low variability; A = auditory; V = visual; A–V– = no stimuli; A–V+ = visual only; A+V– = auditory only; A+V+ = both auditory and visual.

**Results of the Repeated-measures ANOVA with Accuracy.** There were 2.70% errors due to no response within the allotted maximum time window. The results of the repeated-measures ANOVA with accuracy as the dependent variable revealed no significant main effects of the visual stimuli ( $F(1, 29) = 0.543, p = .467$ ), auditory stimuli ( $F(1, 29) = 2.996, p = .094$ ), and speech variability ( $F(1, 29) = 0.032, p = .860$ ). There was also no significant Visual  $\times$  Auditory  $\times$  Variability three-way interaction ( $F(1, 29) = 0.086, p = .772$ ).
