# Supplementary material
Source: publisher figshare collection journal article supplement (https://asha.figshare.com/articles/dataset/_/21357729)
Supplement: Supplementary file 2 [file 1]

**Supplemental Material S6.** Means and standard deviations (in parentheses) of the RT (ms) of the native Mandarin listeners.

|                                 | <b>Visual stimuli</b> |              | <b>Diff.</b> |
|---------------------------------|-----------------------|--------------|--------------|
|                                 | Present               | Absent       |              |
| <b>Auditory stimuli absent</b>  |                       |              |              |
| H+A–V+ vs. H+A–V–               | 942<br>(144)          | 962<br>(161) | 20           |
| H–A–V+ vs. H–A–V–               | 899<br>(156)          | 895<br>(167) | –4           |
| <b>Auditory stimuli present</b> |                       |              |              |
| H+A+V+ vs. H+A+V–               | 822<br>(173)          | 822<br>(145) | 0            |
| H–A+V+ vs. H–A+V–               | 802<br>(171)          | 769<br>(144) | –33          |

*Note.* Diff. = difference between the absence and presence of the visual stimuli; H+ = high variability; H– = low variability; A = auditory; V = visual; A–V– = no stimuli; A–V+ = visual only; A+V– = auditory only; A+V+ = both auditory and visual.

**Results of the Repeated-measures ANOVA with RT.** The results of the repeated-measures ANOVA with RT as the dependent variable revealed significant main effects of the auditory stimuli ( $F(1, 29) = 97.175, p < .001, \eta_p^2 = .770$ ) and speech variability ( $F(1, 29) = 25.216, p < .001, \eta_p^2 = .465$ ) but no significant main effect of the visual stimuli ( $F(1, 29) = 0.337, p = .566$ ). Regarding the three-way interaction, we did not detect a significant Visual  $\times$  Auditory  $\times$  Variability interaction ( $F(1, 29) = 0.107, p = .746$ ).
