# Supplementary material
Source: publisher figshare collection journal article supplement (https://asha.figshare.com/articles/dataset/_/21357729)
Supplement: Supplementary file 3 [file 1]

**Supplemental Material S1.** Intensity, pitch fundamental frequency ( $f_0$ ) of the T2 and T4 starting points and ending points, and tone duration averaged across the four syllables (“*ba*,” “*pa*,” “*da*,” and “*ta*”) used in the experiment for the high-variability (H+) stimuli and the low-variability (H–) stimuli.

|                                                                                              | T2<br>Intensity<br>(dB) | T4<br>Intensity<br>(dB) | T2<br>starting<br>pitch $f_0$<br>(Hz) | T2<br>ending<br>pitch $f_0$<br>(Hz) | T4<br>starting<br>pitch $f_0$<br>(Hz) | T4<br>ending<br>pitch $f_0$<br>(Hz) | T2<br>duration<br>(ms) | T4<br>duration<br>(ms) |
|----------------------------------------------------------------------------------------------|-------------------------|-------------------------|---------------------------------------|-------------------------------------|---------------------------------------|-------------------------------------|------------------------|------------------------|
| High-variability (H+) stimuli: Produced by six different speakers, one time for each speaker |                         |                         |                                       |                                     |                                       |                                     |                        |                        |
| Speaker 1                                                                                    | 78                      | 78                      | 140                                   | 176                                 | 224                                   | 209                                 | 552                    | 378                    |
| Speaker 2                                                                                    | 78                      | 78                      | 129                                   | 167                                 | 194                                   | 161                                 | 433                    | 288                    |
| Speaker 3                                                                                    | 76                      | 77                      | 84                                    | 113                                 | 124                                   | 99                                  | 428                    | 346                    |
| Speaker 4                                                                                    | 79                      | 79                      | 208                                   | 227                                 | 323                                   | 188                                 | 697                    | 507                    |
| Speaker 5                                                                                    | 75                      | 76                      | 206                                   | 242                                 | 296                                   | 197                                 | 462                    | 374                    |
| Speaker 6                                                                                    | 76                      | 77                      | 188                                   | 254                                 | 276                                   | 126                                 | 740                    | 673                    |
| Mean                                                                                         | 77                      | 78                      | 159                                   | 197                                 | 240                                   | 163                                 | 552                    | 428                    |
| Low-variability (H–) stimuli: Produced by only Speaker 1, six times for this speaker         |                         |                         |                                       |                                     |                                       |                                     |                        |                        |
| Time 1                                                                                       | 78                      | 78                      | 140                                   | 176                                 | 224                                   | 209                                 | 552                    | 378                    |
| Time 2                                                                                       | 79                      | 78                      | 140                                   | 173                                 | 226                                   | 216                                 | 485                    | 331                    |
| Time 3                                                                                       | 78                      | 77                      | 145                                   | 179                                 | 239                                   | 219                                 | 560                    | 345                    |
| Time 4                                                                                       | 78                      | 77                      | 143                                   | 186                                 | 242                                   | 189                                 | 546                    | 370                    |
| Time 5                                                                                       | 78                      | 78                      | 140                                   | 168                                 | 226                                   | 212                                 | 528                    | 346                    |
| Time 6                                                                                       | 78                      | 77                      | 150                                   | 180                                 | 252                                   | 224                                 | 558                    | 348                    |
| Mean                                                                                         | 78                      | 77                      | 143                                   | 177                                 | 235                                   | 212                                 | 538                    | 353                    |

*Note.* The value of average intensity was measured on speakers’ pronunciations while recording. All measures were recorded using Praat Version 6.1.53. One thing to explain is that, the intensity or the duration of the T2 and the T4 can be a cue for the participants when identifying these tone pairs. Nevertheless, we did not modify them in order to allow the stimuli to be as natural as possible, given that we controlled for the differences in intensity and duration across all experimental conditions.
