# Supplementary material
Source: publisher figshare collection journal article supplement (https://asha.figshare.com/articles/dataset/_/21357729)
Supplement: Supplementary file 4 [file 1]

**Supplemental Material S4.** Means, standard deviations (in parentheses), and ANOVA statistics of the RT (ms) of the Mandarin learners.

|                          | Visual stimuli |                | Diff. | <i>F</i> (1, 24) | <i>p</i> | $\eta_p^2$ | Power |
|--------------------------|----------------|----------------|-------|------------------|----------|------------|-------|
|                          | Present        | Absent         |       |                  |          |            |       |
| Auditory stimuli absent  |                |                |       |                  |          |            |       |
| H+A–V+ vs. H+A–V–        | 1,191<br>(149) | 1,236<br>(185) | 45*   | 5.860            | .023     | .196       | .642  |
| H–A–V+ vs. H–A–V–        | 1,077<br>(207) | 1,108<br>(176) | 31    | 1.909            | .180     | .074       | .264  |
| Auditory stimuli present |                |                |       |                  |          |            |       |
| H+A+V+ vs. H+A+V–        | 975<br>(232)   | 981<br>(188)   | 6     | 0.069            | .795     | .003       | .057  |
| H–A+V+ vs. H–A+V–        | 884<br>(255)   | 902<br>(212)   | 18    | 0.826            | .372     | .031       | .141  |

*Note.* \* indicates  $p < .05$ ; Diff. = difference between the absence and presence of the visual stimuli; H+ = high variability; H– = low variability; A = auditory; V = visual; A–V– = no stimuli; A–V+ = visual only; A+V– = auditory only; A+V+ = both auditory and visual. The type of power analysis is post hoc computed using  $\alpha = .05$ .
