# Supplementary material
Source: publisher figshare collection journal article supplement (https://asha.figshare.com/articles/dataset/_/21357729)
Supplement: Supplementary file 5 [file 1]

**Supplemental Material S3.** Means, standard deviations (in parentheses), and ANOVA statistics of the accuracy of the Mandarin learners.

|                          | Visual stimuli  |                 | Diff.  | $F(1, 24)$ | $p$  | $\eta_p^2$ | Power |
|--------------------------|-----------------|-----------------|--------|------------|------|------------|-------|
|                          | Present         | Absent          |        |            |      |            |       |
| Auditory stimuli absent  |                 |                 |        |            |      |            |       |
| H+A–V+ vs. H+A–V–        | 0.823<br>(.151) | 0.826<br>(.144) | –0.003 | 0.025      | .875 | .001       | .053  |
| H–A–V+ vs. H–A–V–        | 0.946<br>(.062) | 0.939<br>(.088) | 0.007  | 0.125      | .726 | .005       | .063  |
| Auditory stimuli present |                 |                 |        |            |      |            |       |
| H+A+V+ vs. H+A+V–        | 0.915<br>(.138) | 0.871<br>(.162) | 0.044* | 8.985      | .006 | .272       | .820  |
| H–A+V+ vs. H–A+V–        | 0.962<br>(.055) | 0.950<br>(.075) | 0.012  | 0.866      | .361 | .035       | .145  |

*Note.* \* indicates  $p < .05$ ; Diff. = difference between the presence and absence of the visual stimuli; H+ = high variability; H– = low variability; A = auditory; V = visual; A–V– = no stimuli; A–V+ = visual only; A+V– = auditory only; A+V+ = both auditory and visual. The type of power analysis is post hoc computed using  $\alpha = .05$ .
