# Supplementary material
Source: publisher figshare collection journal article supplement (https://asha.figshare.com/articles/dataset/_/21357729)
Supplement: Supplementary file 6 [file 1]

**Supplemental Material S2.** A description of the stimuli presented in each of the three incongruent conditions.

|                  | Prime                                                                                |                                                                                   | Target                                                                                 |
|------------------|--------------------------------------------------------------------------------------|-----------------------------------------------------------------------------------|----------------------------------------------------------------------------------------|
|                  | Listening to tone                                                                    | Watching visual arrows                                                            | Listening to tone                                                                      |
| A–V+ incongruent | --                                                                                   |  |  bà |
| A+V– incongruent |  bá | --                                                                                |  bà |
| A+V+ incongruent |  bá |  |  bà |

*Note.* The three incongruent conditions are exemplified using rising arrows and the syllable “ba” with a rising tone (i.e., “bá”) or a falling tone (i.e., “bà”). A = auditory; V = visual; A–V+ = visual only; A+V– = auditory only, A+V+ = both auditory and visual.
